# Supplementary material for: L-arginine effects on cerebrovascular reactivity, perfusion and neurovascular coupling in MELAS (mitochondrial encephalomyopathy with lactic acidosis and stroke-like episodes) syndrome
Source: PubMed Central journal article supplement (PMC7470264; doi:10.1371/journal.pone.0238224), 2020-09-03
Supplement: pone.0238224.s001.pdf [file pone.0238224.s001.pdf]

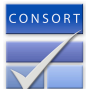

## CONSORT 2010 checklist of information to include when reporting a randomised trial\*

| Section/Topic             | Item No | Checklist item                                                                                                          | Reported on page No                                                |
|---------------------------|---------|-------------------------------------------------------------------------------------------------------------------------|--------------------------------------------------------------------|
| <b>Title and abstract</b> |         |                                                                                                                         |                                                                    |
|                           | 1a      | Identification as a randomised trial in the title                                                                       | This not a randomized trial; It is a clinical pilot efficacy study |
|                           | 1b      | Structured summary of trial design, methods, results, and conclusions (for specific guidance see CONSORT for abstracts) | Pg. 2 of Clinical Protocol (CP)<br>Pg. 4-5 of submitted paper (SP) |
| <b>Introduction</b>       |         |                                                                                                                         |                                                                    |
| Background and objectives | 2a      | Scientific background and explanation of rationale                                                                      | Pg. 3 – 4 (CP)<br>Pg. 6 - 8 (SP)                                   |
|                           | 2b      | Specific objectives or hypotheses                                                                                       | Pg. 4 – 5 (CP)<br>Pg. 8 (SP)                                       |
| <b>Methods</b>            |         |                                                                                                                         |                                                                    |
| Trial design              | 3a      | Description of trial design (such as parallel, factorial) including allocation ratio                                    | Pg. 7-8 (CP)<br>Pg. 10-11 (SP)                                     |
|                           | 3b      | Important changes to methods after trial commencement (such as eligibility criteria), with reasons                      | No changes                                                         |
| Participants              | 4a      | Eligibility criteria for participants                                                                                   | Pg. 6-7 (CP)<br>Pg. 9-10 (SP)                                      |
|                           | 4b      | Settings and locations where the data were collected                                                                    | Pg. 6 (CP)<br>CRC at HSC (SickKids) and UHN                        |

|                                          |    |                                                                                                                                       |                                                                                                                                                                                                                           |
|------------------------------------------|----|---------------------------------------------------------------------------------------------------------------------------------------|---------------------------------------------------------------------------------------------------------------------------------------------------------------------------------------------------------------------------|
|                                          |    |                                                                                                                                       | (Toronto<br>Western<br>Hospital –<br>MRI centre)<br>sites (CP)<br>Pg. 9-10 (SP)                                                                                                                                           |
| Interventions                            | 5  | The interventions for each group with sufficient details to allow replication, including how and when they were actually administered | Pg. 7- 8 (CP)<br>Pg.10-11 (SP)                                                                                                                                                                                            |
| Outcomes                                 | 6a | Completely defined pre-specified primary and secondary outcome measures, including how and when they were assessed                    | Pg. 8 (CP)<br>Pg.10-14 (SP)                                                                                                                                                                                               |
|                                          | 6b | Any changes to trial outcomes after the trial commenced, with reasons                                                                 | No changes                                                                                                                                                                                                                |
| Sample size                              | 7a | How sample size was determined                                                                                                        | Pg. 8 (CP)<br>Analysis –<br>pilot study to<br>generate<br>estimates of<br>means and<br>SD's to<br>determine<br>adequate<br>samples sizes<br>to detect<br>statistically<br>significant<br>differences in<br>future studies |
|                                          | 7b | When applicable, explanation of any interim analyses and stopping guidelines                                                          | Not applicable                                                                                                                                                                                                            |
| Randomisation:<br>Sequence<br>generation | 8a | Method used to generate the random allocation sequence                                                                                | Not<br>randomized                                                                                                                                                                                                         |
|                                          | 8b | Type of randomisation; details of any restriction (such as blocking and block size)                                                   | Not<br>randomized                                                                                                                                                                                                         |
| Allocation                               | 9  | Mechanism used to implement the random allocation sequence (such as sequentially numbered containers),                                | Not applicable                                                                                                                                                                                                            |

|                                                      |     |                                                                                                                                                |                                                                                                                                                                                                                                             |
|------------------------------------------------------|-----|------------------------------------------------------------------------------------------------------------------------------------------------|---------------------------------------------------------------------------------------------------------------------------------------------------------------------------------------------------------------------------------------------|
| concealment mechanism                                |     | describing any steps taken to conceal the sequence until interventions were assigned                                                           |                                                                                                                                                                                                                                             |
| Implementation                                       | 10  | Who generated the random allocation sequence, who enrolled participants, and who assigned participants to interventions                        | Pg. 10 (SP)<br>MELAS sibling cohort recruited from Neurometabolic clinic at HSC by clinic nurse; healthy controls recruited by referral and self-selection through posted advertisement at HSC and University of Toronto and screened by PI |
| Blinding                                             | 11a | If done, who was blinded after assignment to interventions (for example, participants, care providers, those assessing outcomes) and how       | No blinding                                                                                                                                                                                                                                 |
|                                                      | 11b | If relevant, description of the similarity of interventions                                                                                    | Not applicable                                                                                                                                                                                                                              |
| Statistical methods                                  | 12a | Statistical methods used to compare groups for primary and secondary outcomes                                                                  | Pg. 8 (CP)<br>Pg.14-15 (SP)                                                                                                                                                                                                                 |
|                                                      | 12b | Methods for additional analyses, such as subgroup analyses and adjusted analyses                                                               | Not applicable                                                                                                                                                                                                                              |
| <b>Results</b>                                       |     |                                                                                                                                                |                                                                                                                                                                                                                                             |
| Participant flow (a diagram is strongly recommended) | 13a | For each group, the numbers of participants who were randomly assigned, received intended treatment, and were analysed for the primary outcome | 3 MELAS sibs (2 F, 1 M)<br>4 Health controls age-                                                                                                                                                                                           |

|               |     |                                                                                  |                                                                                                                                                             |
|---------------|-----|----------------------------------------------------------------------------------|-------------------------------------------------------------------------------------------------------------------------------------------------------------|
|               |     |                                                                                  | and sex-matched (see S1. Consort Flow Diagram with paper)                                                                                                   |
|               | 13b | For each group, losses and exclusions after randomisation, together with reasons | No randomization<br>4 MELAS sibs, 1 unable to participate;<br>7 controls, 3 excluded: 1 not meeting inclusion criteria, 1 declined, 1 unable to participate |
| Recruitment   | 14a | Dates defining the periods of recruitment and follow-up                          | Recruitment, clinical testing and follow up in 14 mos from March 2012 to May 2013                                                                           |
|               | 14b | Why the trial ended or was stopped                                               | Trial was completed                                                                                                                                         |
| Baseline data | 15  | A table showing baseline demographic and clinical characteristics for each group | See Table 1 in prior PLOS ONE publication of ergometric results in PLoS                                                                                     |

---

One.2015  
May 20;10(5)  
:e0127066.doi  
:10.1371/jour  
nal.pone.0127  
066.eCollectio  
n 2015; PMID  
25993630

---

Numbers analysed 16 For each group, number of participants (denominator) included in each analysis and whether the analysis was by original assigned groups

3 MELAS  
4 Healthy  
controls (HC)

---

Outcomes and estimation 17a For each primary and secondary outcome, results for each group, and the estimated effect size and its precision (such as 95% confidence interval)

For  
comparison of  
MELAS to HC  
at baseline,  
the p-value  
was  
calculated  
using  
unpaired two-  
tailed  
Student's t-  
test; 95 % CI  
For  
comparison of  
MELAS  
baseline to  
single dose or  
steady state  
L-Arg, p-value  
was  
calculated  
using two-  
tailed paired t-

|                    |     |                                                                                                                                           |                                                                                                                                                                                                                                                                             |
|--------------------|-----|-------------------------------------------------------------------------------------------------------------------------------------------|-----------------------------------------------------------------------------------------------------------------------------------------------------------------------------------------------------------------------------------------------------------------------------|
|                    |     |                                                                                                                                           | test; 95 % CI; statistical significance set at p-value $\leq 0.05$ Pearson's correlation coefficient $\text{®}$ was determined between the % mutant mtDNA blood and the CVR (cerebrovascular reactivity) and between the % mutant mtDNA blood and CBF (cerebral blood flow) |
|                    |     |                                                                                                                                           | <u>Not applicable</u>                                                                                                                                                                                                                                                       |
| Ancillary analyses | 17b | For binary outcomes, presentation of both absolute and relative effect sizes is recommended                                               | Not applicable                                                                                                                                                                                                                                                              |
|                    | 18  | Results of any other analyses performed, including subgroup analyses and adjusted analyses, distinguishing pre-specified from exploratory | Not applicable                                                                                                                                                                                                                                                              |
| Harms              | 19  | All important harms or unintended effects in each group (for specific guidance see CONSORT for harms)                                     | No harms or unintended effects in MELAS or HC                                                                                                                                                                                                                               |
| <b>Discussion</b>  |     |                                                                                                                                           |                                                                                                                                                                                                                                                                             |
| Limitations        | 20  | Trial limitations, addressing sources of potential bias, imprecision, and, if relevant, multiplicity of analyses                          | <u>Pg.32-33 (SP)</u>                                                                                                                                                                                                                                                        |
| Generalisability   | 21  | Generalisability (external validity, applicability) of the trial findings                                                                 | <u>Preliminary pilot data</u>                                                                                                                                                                                                                                               |

|                          |    |                                                                                                               |                                                                                                                                                                                                                                                       |
|--------------------------|----|---------------------------------------------------------------------------------------------------------------|-------------------------------------------------------------------------------------------------------------------------------------------------------------------------------------------------------------------------------------------------------|
| Interpretation           | 22 | Interpretation consistent with results, balancing benefits and harms, and considering other relevant evidence | Pg.26-33 (SP)                                                                                                                                                                                                                                         |
| <b>Other information</b> |    |                                                                                                               |                                                                                                                                                                                                                                                       |
| Registration             | 23 | Registration number and name of trial registry                                                                | ClinicalTrials.gov:<br>NCT01603446                                                                                                                                                                                                                    |
| Protocol                 | 24 | Where the full trial protocol can be accessed, if available                                                   | S3:<br>Supplementary<br>With paper                                                                                                                                                                                                                    |
| Funding                  | 25 | Sources of funding and other support (such as supply of drugs), role of funders                               | Pg. 3,4 & 33 (SP): UMDF – UMDF had no had no role in the study design, data collection and analysis, decision to publish or preparation of the manuscript<br>Pg. 11 (SP) L-Arginine (NPN80002672 ) supplied by NOW foods, Bloomingdale, Illinois, USA |

\*We strongly recommend reading this statement in conjunction with the CONSORT 2010 Explanation and Elaboration for important clarifications on all the items. If relevant, we also recommend reading CONSORT extensions for cluster randomised trials, non-inferiority and equivalence trials, non-pharmacological treatments, herbal interventions, and pragmatic trials. Additional extensions are forthcoming: for those and for up to date references relevant to this checklist, see [www.consort-statement.org](http://www.consort-statement.org).
